# Supplementary material
Source: ML conference proceedings conference paper supplement (https://openreview.net/forum?id=qumBHr77ht)
Supplement: supplementary_material [file attachment]

## References

- [AMDW13] Pablo Azar, Silvio Micali, Constantinos Daskalakis, and S Matthew Weinberg. Optimal and efficient parametric auctions. In *Proceedings of the twenty-fourth annual ACM-SIAM symposium on Discrete algorithms*, pages 596–604. SIAM, 2013.
- [ANSS19] Nima Anari, Rad Niazadeh, Amin Saberi, and Ali Shameli. Nearly optimal pricing algorithms for production constrained and laminar bayesian selection. In *Proceedings of the 2019 ACM Conference on Economics and Computation*, pages 91–92, 2019.
- [BCD20] Johannes Brustle, Yang Cai, and Constantinos Daskalakis. Multi-item mechanisms without item-independence: Learnability via robustness. In *Proceedings of the 21st ACM Conference on Economics and Computation, EC '20*, page 715–761, New York, NY, USA, 2020. Association for Computing Machinery.
- [BCKW15] Patrick Briest, Shuchi Chawla, Robert Kleinberg, and S Matthew Weinberg. Pricing lotteries. *Journal of Economic Theory*, 156:144–174, 2015.
- [BGLT19] Xiaohui Bei, Nick Gravin, Pinyan Lu, and Zhihao Gavin Tang. Correlation-robust analysis of single item auction. In *Proceedings of the Thirtieth Annual ACM-SIAM Symposium on Discrete Algorithms*, pages 193–208. SIAM, 2019.
- [BH78] J. L. Bretagnolle and Catherine Huber. Estimation des densités: risque minimax. *Zeitschrift für Wahrscheinlichkeitstheorie und Verwandte Gebiete*, 47:119–137, 1978.
- [BILW20] Moshe Babaioff, Nicole Immorlica, Brendan Lucier, and S Matthew Weinberg. A simple and approximately optimal mechanism for an additive buyer. *Journal of the ACM (JACM)*, 67(4):1–40, 2020.
- [BS11] Dirk Bergemann and Karl Schlag. Robust monopoly pricing. *Journal of Economic Theory*, 146(6):2527–2543, 2011.
- [Car17] Gabriel Carroll. Robustness and separation in multidimensional screening. *Econometrica*, 85(2):453–488, 2017.
- [CD17] Yang Cai and Constantinos Daskalakis. Learning multi-item auctions with (or without) samples. In *2017 IEEE 58th Annual Symposium on Foundations of Computer Science (FOCS)*, pages 516–527. IEEE, 2017.
- [CDW16] Yang Cai, Nikhil R. Devanur, and S. Matthew Weinberg. A duality based unified approach to bayesian mechanism design. In *Proceedings of the Forty-Eighth Annual ACM Symposium on Theory of Computing, STOC '16*, page 926–939, New York, NY, USA, 2016. Association for Computing Machinery.
- [CHK07] Shuchi Chawla, Jason D. Hartline, and Robert Kleinberg. Algorithmic pricing via virtual valuations. In *Proceedings of the 8th ACM Conference on Electronic Commerce, EC '07*, pages 243–251, New York, NY, USA, 2007. ACM.
- [CHMS10] Shuchi Chawla, Jason D Hartline, David L Malec, and Balasubramanian Sivan. Multi-parameter mechanism design and sequential posted pricing. In *Proceedings of the forty-second ACM symposium on Theory of computing*, pages 311–320. ACM, 2010.
- [CM16] Shuchi Chawla and J Benjamin Miller. Mechanism design for subadditive agents via an ex ante relaxation. In *Proceedings of the 2016 ACM Conference on Economics and Computation*, pages 579–596. ACM, 2016.
- [CMS15] Shuchi Chawla, David Malec, and Balasubramanian Sivan. The power of randomness in bayesian optimal mechanism design. *Games and Economic Behavior*, 91:297–317, 2015.
- [CO21] Yang Cai and Argyris Oikonomou. On simple mechanisms for dependent items. In *Proceedings of the 22nd ACM Conference on Economics and Computation*, pages 242–262, 2021.

- [COVZ21] Yang Cai, Argyris Oikonomou, Grigoris Veleghkas, and Mingfei Zhao. An efficient  $\varepsilon$ -bic to bic transformation and its application to black-box reduction in revenue maximization. In *Proceedings of the 2021 ACM-SIAM Symposium on Discrete Algorithms (SODA)*, pages 1337–1356. SIAM, 2021.
- [CR14] Richard Cole and Tim Roughgarden. The sample complexity of revenue maximization. In *Proceedings of the forty-sixth annual ACM symposium on Theory of computing*, pages 243–252, 2014.
- [CZ17] Yang Cai and Mingfei Zhao. Simple mechanisms for subadditive buyers via duality. In *Proceedings of the 49th Annual ACM SIGACT Symposium on Theory of Computing*, pages 170–183. ACM, 2017.
- [Das15] Constantinos Daskalakis. Multi-item auctions defying intuition? *ACM SIGecom Exchanges*, 14(1):41–75, 2015.
- [DFK11] Shahar Dobzinski, Hu Fu, and Robert D. Kleinberg. Optimal auctions with correlated bidders are easy. In *Proceedings of the Forty-Third Annual ACM Symposium on Theory of Computing*, STOC '11, page 129–138, New York, NY, USA, 2011. Association for Computing Machinery.
- [DFKL20] Paul Dütting, Michal Feldman, Thomas Kesselheim, and Brendan Lucier. Prophet inequalities made easy: Stochastic optimization by pricing nonstochastic inputs. *SIAM Journal on Computing*, 49(3):540–582, 2020.
- [DG85] Luc Devroye and László Györfi. *Nonparametric Density Estimation: The  $L_1$  View*. Wiley Series in Probability and Mathematical Statistics. John Wiley & Sons, Inc., New York, NY, USA, 1985.
- [DHP16] Nikhil R Devanur, Zhiyi Huang, and Christos-Alexandros Psomas. The sample complexity of auctions with side information. In *Proceedings of the forty-eighth annual ACM symposium on Theory of Computing*, pages 426–439, 2016.
- [DK19] Paul Dütting and Thomas Kesselheim. Posted pricing and prophet inequalities with inaccurate priors. In *Proceedings of the 2019 ACM Conference on Economics and Computation*, EC '19, page 111–129, New York, NY, USA, 2019. Association for Computing Machinery.
- [DKL20] Paul Dütting, Thomas Kesselheim, and Brendan Lucier. An  $o(\log \log m)$  prophet inequality for subadditive combinatorial auctions. *ACM SIGecom Exchanges*, 18(2):32–37, 2020.
- [Dob70] Roland L. Dobrushin. Prescribing a system of random variables by conditional distributions. *Theory of Probability and Its Applications*, 15(3):469–497, 1970.
- [Dob71] Roland L. Dobrushin. Markov processes with a large number of locally interacting components: Existence of a limit process and its ergodicity. *Problemy Peredachi Informatsii*, 7(2):70–87, 1971.
- [Doe38] Wolfgang Doeblin. Exposé de la théorie des chaînes simples constantes de Markov à un nombre fini d'états. *Revue Mathématique de l'Union Interbalkanique*, 2:77–105, 1938.
- [Dud68] Richard M. Dudley. Distances of probability measures and random variables. *The Annals of Mathematical Statistics*, 39(5):1563–1572, October 1968.
- [DW12] Constantinos Daskalakis and Seth Matthew Weinberg. Symmetries and optimal multi-dimensional mechanism design. In *Proceedings of the 13th ACM Conference on Electronic Commerce*, EC '12, page 370–387, New York, NY, USA, 2012. Association for Computing Machinery.
- [FGL14] Michal Feldman, Nick Gravin, and Brendan Lucier. Combinatorial auctions via posted prices. In *Proceedings of the twenty-sixth annual ACM-SIAM symposium on Discrete algorithms*, pages 123–135. SIAM, 2014.

- [GHZ19] Chenghao Guo, Zhiyi Huang, and Xinzhi Zhang. Settling the sample complexity of single-parameter revenue maximization. In *Proceedings of the 51st Annual ACM SIGACT Symposium on Theory of Computing*, pages 662–673, 2019.
- [GL18] Nick Gravin and Pinyan Lu. Separation in correlation-robust monopolist problem with budget. In *Proceedings of the Twenty-Ninth Annual ACM-SIAM Symposium on Discrete Algorithms*, pages 2069–2080. SIAM, 2018.
- [GPTD23] Yiannis Giannakopoulos, Diogo Poças, and Alexandros Tsigonias-Dimitriadis. Robust revenue maximization under minimal statistical information. *ACM Transactions on Economics and Computation*, 10(3):1–34, 2023.
- [Gri75] David Griffeath. A maximal coupling for markov chains. *Zeitschrift für Wahrscheinlichkeitstheorie und Verwandte Gebiete*, 31:95–106, June 1975.
- [GW21] Yannai A Gonczarowski and S Matthew Weinberg. The sample complexity of up-to- $\epsilon$  multi-dimensional revenue maximization. *Journal of the ACM (JACM)*, 68(3):1–28, 2021.
- [HJW15] Yanjun Han, Jiantao Jiao, and Tsachy Weissman. Minimax estimation of discrete distributions under  $\ell_1$  loss. *IEEE Transactions on Information Theory*, 61(11):6343–6354, November 2015.
- [HMR15] Zhiyi Huang, Yishay Mansour, and Tim Roughgarden. Making the most of your samples. In *Proceedings of the Sixteenth ACM Conference on Economics and Computation*, pages 45–60, 2015.
- [HN13] Sergiu Hart and Noam Nisan. The menu-size complexity of auctions. *ACM Conference on Electronic Commerce*, 04 2013.
- [HN19] Sergiu Hart and Noam Nisan. Selling multiple correlated goods: Revenue maximization and menu-size complexity. *Journal of Economic Theory*, 183:991–1029, 2019.
- [Kal21] Olav Kallenberg. *Foundations of Modern Probability*, volume 99 of *Probability Theory and Stochastic Modelling*. Springer, New York, NY, USA, third edition, 2021.
- [Kan60] Leonid V. Kantorovich. Mathematical methods of organizing and planning production. *Management Science*, 6(4):366–422, July 1960.
- [KS80] Ross Kindermann and Laurie Snell. *Markov random fields and their applications*, volume 1. American Mathematical Society, 1980.
- [KW19] Robert Kleinberg and S Matthew Weinberg. Matroid prophet inequalities and applications to multi-dimensional mechanism design. *Games and Economic Behavior*, 113:97–115, 2019.
- [LLY19] Yingkai Li, Pinyan Lu, and Haoran Ye. Revenue maximization with imprecise distribution. In *Proceedings of the 18th International Conference on Autonomous Agents and MultiAgent Systems*, pages 1582–1590, 2019.
- [LPW09] David A. Levin, Yuval Peres, and Elizabeth L. Wilmer. *Markov Chains and Mixing Times*. American Mathematical Society, Providence, RI, USA, first edition, 2009.
- [Luc17] Brendan Lucier. An economic view of prophet inequalities. *ACM SIGecom Exchanges*, 16(1):24–47, 2017.
- [LY13] Xinye Li and Andrew Chi-Chih Yao. On revenue maximization for selling multiple independently distributed items. *Proceedings of the National Academy of Sciences*, 110(28):11232–11237, 2013.
- [Mak19] Anuran Makur. *Information Contraction and Decomposition*. Sc.D. thesis in Electrical Engineering and Computer Science, Massachusetts Institute of Technology, Cambridge, MA, USA, May 2019.

- [MR16] Jamie Morgenstern and Tim Roughgarden. Learning simple auctions. In *Conference on Learning Theory*, pages 1298–1318. PMLR, 2016.
- [PSCW22] Alexandros Psomas, Ariel Schwartzman Cohenca, and S Weinberg. On infinite separations between simple and optimal mechanisms. *Advances in Neural Information Processing Systems*, 35:4818–4829, 2022.
- [PSW19] Alexandros Psomas, Ariel Schwartzman, and S Matthew Weinberg. Smoothed analysis of multi-item auctions with correlated values. In *Proceedings of the 2019 ACM Conference on Economics and Computation*, pages 417–418. ACM, 2019.
- [PW22] Yury Polyanskiy and Yihong Wu. *Information Theory: From Coding to Learning*. Cambridge University Press Preprint, New York, NY, USA, 2022.
- [RS17] Aviad Rubinfeld and Sahil Singla. Combinatorial prophet inequalities. In *Proceedings of the Twenty-Eighth Annual ACM-SIAM Symposium on Discrete Algorithms*, pages 1671–1687. SIAM, 2017.
- [RW15] Aviad Rubinfeld and S Matthew Weinberg. Simple mechanisms for a subadditive buyer and applications to revenue monotonicity. In *Proceedings of the Sixteenth ACM Conference on Economics and Computation*, pages 377–394. ACM, 2015.
- [RW18] Aviad Rubinfeld and S. Matthew Weinberg. Simple mechanisms for a subadditive buyer and applications to revenue monotonicity. *ACM Trans. Econ. Comput.*, 6(3–4), oct 2018.
- [SC84] Ester Samuel-Cahn. Comparison of Threshold Stop Rules and Maximum for Independent Nonnegative Random Variables. *The Annals of Probability*, 12(4):1213 – 1216, 1984.
- [SK75] David Sherrington and Scott Kirkpatrick. Solvable model of a spin-glass. *Phys. Rev. Lett.*, 35:1792–1796, Dec 1975.
- [Sko56] Anatoliy V. Skorokhod. Limit theorems for stochastic processes. *Theory of Probability and Its Applications*, 1(3):261–290, 1956.
- [ST04] Daniel A Spielman and Shang-Hua Teng. Nearly-linear time algorithms for graph partitioning, graph sparsification, and solving linear systems. In *Proceedings of the thirty-sixth annual ACM symposium on Theory of computing*, pages 81–90. ACM, 2004.
- [Str65] Volker Strassen. The existence of probability measures with given marginals. *The Annals of Mathematical Statistics*, 36(2):423–439, April 1965.
- [Tsy08] Alexandre B. Tsybakov. *Introduction to Nonparametric Estimation*. Springer Publishing Company, Incorporated, 1st edition, 2008.
- [Vil09] Cédric Villani. *Optimal Transport: Old and New*, volume 338 of *Grundlehren der mathematischen Wissenschaften*. Springer, Berlin, Heidelberg, Germany, 2009.
- [Wic70] Michael J. Wichura. On the construction of almost uniformly convergent random variables with given weakly convergent image laws. *The Annals of Mathematical Statistics*, 4141(1):284–291, February 1970.
- [Yao15] Andrew Chi-Chih Yao. An n-to-1 bidder reduction for multi-item auctions and its applications. In *Proceedings of the Twenty-Sixth Annual ACM-SIAM Symposium on Discrete Algorithms*, pages 92–109. Society for Industrial and Applied Mathematics, 2015.

## A Proofs missing from Section 3

The following simple proposition will also be useful in multiple proofs throughout this appendix.

**Proposition 5.** *Let  $\mathcal{M}$  be an ex-post IR mechanism. Then,  $-H \leq u_i^{\mathcal{M}}(t_i \leftarrow t'_i, t_{-i}) \leq 3H$ , for all  $i \in [n], t_i, t'_i \in \mathcal{T}_i, t_{-i} \in \mathcal{T}_{-i}$ .*

*Proof of Proposition 5.* Since  $\mathcal{M}$  is ex-post IR, we have that  $t_i(\mathcal{M}(t_i, t_{-i})) \geq 0$ , for all  $i \in [n], t_i \in \mathcal{T}_i, t_{-i} \in \mathcal{T}_{-i}$ . Furthermore, since payments are lower bounded by  $-H$ , and since the valuations are bounded and quasi-linear, we have that  $t_i(\mathcal{M}(t'_i, t_{-i})) \leq 2H$ , for all  $i \in [n], t_i, t'_i \in \mathcal{T}_i, t_{-i} \in \mathcal{T}_{-i}$ . Since payments are also upper bounded by  $H$  (due to the ex-post IR constraint), and valuations are non-negative, we also have  $t_i(\mathcal{M}(t'_i, t_{-i})) \geq -H$ , for all  $i \in [n], t_i, t'_i \in \mathcal{T}_i, t_{-i} \in \mathcal{T}_{-i}$ . Combining these inequalities we have  $-H \leq u_i(t_i \leftarrow t'_i, t_{-i}) \leq 3H$ , for all  $i \in [n], t_i, t'_i \in \mathcal{T}_i, t_{-i} \in \mathcal{T}_{-i}$ .  $\square$

### A.1 Relaxing the assumptions in Theorem 1

We start by showing that, in sharp contrast to BIC, the DSIC property is much easier to “propagate” from a small set of types to a larger set, using the following construction.

**Definition 3** (DSIC extension of a mechanism). *Let  $\mathcal{T}_i^+ \subseteq \mathcal{T}_i$  be a subset of possible types for agent  $i \in [n]$ , such that  $\perp \in \mathcal{T}_i^+$ , and let  $\mathcal{M} = (x, p)$  be a mechanism defined on types  $\times_{i \in [n]} \mathcal{T}_i^+$ . The extension of  $\mathcal{M}$  to  $\mathcal{T}$  is the mechanism  $\widehat{\mathcal{M}} = (\widehat{x}, \widehat{p})$ , where for reported types  $t = (t_1, \dots, t_n)$ :*

1. *If  $\times_{i \in [n]} \mathcal{T}_i^+$ , then  $\widehat{x}(t) = x(t)$  and  $\widehat{p}(t) = p(t)$ .*
2. *If there exists  $i$ , such that  $t_i \notin \mathcal{T}_i^+$  and  $\forall j \in [n]/\{i\} : t_j \in \mathcal{T}_j^+$  then  $\widehat{x}_i(t) = x_i(t'_i, t_{-i})$  and  $\widehat{p}_i(t) = \widehat{p}_i(t'_i, t_{-i})$ , where  $t'_i = \arg \max_{z_i \in \mathcal{T}_i^+} t_i(\mathcal{M}(z_i, t_{-i}))$ . For each  $j \in [n]/\{i\}$  we have that  $\widehat{x}_j(t) = 0$  and  $\widehat{p}_j(t) = 0$  (They receive nothing, and pay nothing).*
3. *If there exist  $i, i'$  such that  $i \neq i'$  and  $t_i \notin \mathcal{T}_i^+$  and  $t_{i'} \notin \mathcal{T}_{i'}^+$ , then nobody receives and pays nothing (i.e.  $\widehat{x}(t) = 0, \widehat{p}(t) = 0$ ).*

A similar construction appears in [DFK11], in the context of implementing the solution of a linear program as a DSIC auction.

**Lemma 6.** *Let  $\mathcal{T}_i^+ \subseteq \mathcal{T}_i$  be a subset of possible types for agent  $i \in [n]$ , such that  $\perp \in \mathcal{T}_i^+$ , and let  $\mathcal{M} = (x, p)$  be a DSIC and ex-post IR mechanism defined on types  $\mathcal{T}^+ = \times_{i \in [n]} \mathcal{T}_i^+$ . Then, the extension of  $\mathcal{M}$  to  $\mathcal{T}$ ,  $\widehat{\mathcal{M}} = (\widehat{x}, \widehat{p})$ , is DSIC and ex-post IR.*

*Proof of Lemma 6.* The fact that  $\widehat{\mathcal{M}}$  is ex-post IR is trivial for cases 1 and 3 of Definition 3. For case 2, it is trivial that it is ex-post IR for all  $j \in [n]/\{i\}$ . Also since  $\perp \in \mathcal{T}_i^+$  we have that  $\max_{z_i \in \mathcal{T}_i^+} t_i(\mathcal{M}(z_i, t_{-i})) \geq t_i(\mathcal{M}(\perp, t_{-i})) \geq 0$ , which implies that the mechanism is ex-post IR for agent  $i$ .

Next, we argue that  $\widehat{\mathcal{M}}$  is DSIC. If  $t \in \mathcal{T}^+$ , then any misreport  $t'_i$  of agent  $i$  will also get mapped to a type in  $\mathcal{T}_i^+$ ; since  $\mathcal{M}$  is DSIC, agent  $i$  cannot increase her utility by deviating. If  $t$  falls into the second case, an agent  $j \in [n]/\{i\}$  receives nothing and pays nothing, no matter what she reports. If agent  $i$  misreports a type  $t'_i$ , she either receives utility  $t_i(\mathcal{M}(t'_i, t_{-i}))$ , if  $t'_i \in \mathcal{T}_i^+$ , or  $t_i(\mathcal{M}((t^*)', t_{-i}))$ , where  $(t^*)' = \arg \max_{z_i \in \mathcal{T}_i^+} t'_i(\mathcal{M}(z_i, t_{-i}))$ , if  $t'_i \notin \mathcal{T}_i^+$ , both of which are (weakly) worse than  $\max_{z_i \in \mathcal{T}_i^+} t_i(\mathcal{M}(z_i, t_{-i}))$ , her utility when reporting  $t_i$ . Finally, in case 3, every agent  $i$  always receives nothing and pays nothing, even after unilaterally changing her report.  $\square$

Thus without loss of generality, we can always assume that DSIC mechanism defined on a subset of the type space  $\mathcal{T}^+ \subseteq \mathcal{T}$  is DSIC on all bids in  $\mathcal{T}$ .

## A.2 Proofs missing from Section 3.2

*Proof of Lemma 3.*

$$\begin{aligned}
2 d_{\text{TV}}(P_{X,Y}, Q_{X,Y}) &= \sum_x \sum_y |P_{X,Y}(x,y) - Q_{X,Y}(x,y)| \\
&\geq \sum_{x:Q_X(x)>0} \sum_y |P_{X,Y}(x,y) - Q_{X,Y}(x,y)| \\
&= \sum_{x:Q_X(x)>0} Q_X(x) \sum_y \left| P_{Y|X=x}(y) \frac{P_X(x)}{Q_X(x)} - Q_{Y|X=x}(y) - P_{Y|X=x}(y) + P_{Y|X=x}(y) \right| \\
&\geq \sum_{x:Q_X(x)>0} Q_X(x) \sum_y \left( |P_{Y|X=x}(y) - Q_{Y|X=x}(y)| - P_{Y|X=x}(y) \left| 1 - \frac{P_X(x)}{Q_X(x)} \right| \right) \\
&= \sum_{x:Q_X(x)>0} Q_X(x) \left( 2 d_{\text{TV}}(P_{Y|X=x}, Q_{Y|X=x}) - \frac{|Q_X(x) - P_X(x)|}{Q_X(x)} \right) \\
&\geq \left( 2 \sum_x Q_X(x) d_{\text{TV}}(P_{Y|X=x}, Q_{Y|X=x}) \right) - 2 d_{\text{TV}}(Q_X, P_X).
\end{aligned}$$

Re-arranging, we have that

$$\mathbb{E}_{x \sim Q_X} [d_{\text{TV}}(P_{Y|X=x}, Q_{Y|X=x})] \leq d_{\text{TV}}(P_{X,Y}, Q_{X,Y}) + d_{\text{TV}}(Q_X, P_X).$$

The data processing inequality gives us that  $d_{\text{TV}}(Q_X, P_X) \leq d_{\text{TV}}(P_{X,Y}, Q_{X,Y})$  [PW22, Theorem 7.4], and thus we have  $\mathbb{E}_{x \sim Q_X} [d_{\text{TV}}(P_{Y|X=x}, Q_{Y|X=x})] \leq 2 d_{\text{TV}}(P_{X,Y}, Q_{X,Y})$ , as desired. For distributions supported over continuous sets, the proof follows with similar arguments.

So far, we have established that  $\mathbb{E}_{x \sim Q_X} [d_{\text{TV}}(P_{Y|X=x}, Q_{Y|X=x})] \leq d_{\text{TV}}(P_{X,Y}, Q_{X,Y}) + d_{\text{TV}}(Q_X, P_X)$ . Using Markov's inequality completes the proof of Lemma 3.  $\square$

*Proof of Lemma 4.*  $\mathcal{M}$  is ex-post IR for  $\mathcal{D}'$ , by definition. Let  $\mathcal{D}_{-i|t_i}$  be the probability distribution for the valuations of every agent except  $i$ , conditioned on the event that the type of agent  $i$  is  $t_i \in \mathcal{T}_i$ . Proposition 5 implies that  $u_i^{\mathcal{M}}(t_i \leftarrow w_i, t_{-i}) \in [-H, 3H]$ , for all  $i \in [n]$ ,  $t_i, w_i \in \mathcal{T}_i, t_{-i} \in \mathcal{T}_{-i}$ , and therefore  $u_i^{\mathcal{M}}(t_i \leftarrow w_i, t_{-i}) - u_i^{\mathcal{M}}(t_i \leftarrow w_i, t'_{-i}) \leq 4H \mathbb{1}\{t_{-i} \neq t'_{-i}\}$ . Thus, for any coupling  $\gamma$  of  $\mathcal{D}_{-i|t_i}$  and  $\mathcal{D}'_{-i|t_i}$ , and specifically for the optimal coupling  $\gamma^*$  between  $\mathcal{D}_{-i|t_i}$  and  $\mathcal{D}'_{-i|t_i}$  (see Definition 2), we have:

$$\begin{aligned}
\mathbb{E}_{(t_{-i}, t'_{-i}) \sim \gamma^*} [u_i^{\mathcal{M}}(t_i \leftarrow w_i, t_{-i}) - u_i^{\mathcal{M}}(t_i \leftarrow w_i, t'_{-i})] &\leq 4H \mathbb{E}_{(t_{-i}, t'_{-i}) \sim \gamma^*} [\mathbb{1}\{t_{-i} \neq t'_{-i}\}] \\
&\leq 4H d_{\text{TV}}(\mathcal{D}_{-i|t_i}, \mathcal{D}'_{-i|t_i}).
\end{aligned}$$

Using linearity of expectation and re-arranging we have:

$$-\mathbb{E}_{t'_{-i} \sim \mathcal{D}'_{-i|t_i}} [u_i^{\mathcal{M}}(t_i \leftarrow w_i, t'_{-i})] \leq 4H d_{\text{TV}}(\mathcal{D}_{-i|t_i}, \mathcal{D}'_{-i|t_i}) - \mathbb{E}_{t_{-i} \sim \mathcal{D}_{-i|t_i}} [u_i^{\mathcal{M}}(t_i \leftarrow w_i, t_{-i})].$$

By setting  $Q_X = \mathcal{D}'_i$ ,  $P_{Y|X=x} = \mathcal{D}_{-i|t_i}$ , and  $Q_{Y|X=x} = \mathcal{D}'_{-i|t_i}$  in Lemma 3 we have that, with probability at least  $1 - q$ ,  $d_{\text{TV}}(\mathcal{D}_{-i|t_i}, \mathcal{D}'_{-i|t_i}) \leq \frac{2}{q} d_{\text{TV}}(\mathcal{D}, \mathcal{D}') \leq 2 \frac{\delta}{q}$ . Therefore, with probability at least  $1 - q$ :

$$\begin{aligned}
-\mathbb{E}_{t'_{-i} \sim \mathcal{D}'_{-i|t_i}} [u_i^{\mathcal{M}}(t_i \leftarrow w_i, t'_{-i})] &\leq 4H d_{\text{TV}}(\mathcal{D}_{-i|t_i}, \mathcal{D}'_{-i|t_i}) - \mathbb{E}_{t_{-i} \sim \mathcal{D}_{-i|t_i}} [u_i^{\mathcal{M}}(t_i \leftarrow w_i, t_{-i})] \\
&\leq 8H \frac{\delta}{q} - \mathbb{E}_{t_{-i} \sim \mathcal{D}_{-i|t_i}} [u_i^{\mathcal{M}}(t_i \leftarrow w_i, t_{-i})] \\
&\leq \frac{8H\delta}{q},
\end{aligned}$$

where the last inequality uses the fact that  $\mathcal{M}$  is BIC. Replacing with the definition of  $u_i^{\mathcal{M}}(t_i \leftarrow w_i, t'_{-i})$  we get  $-\mathbb{E}_{t_{-i} \sim \mathcal{D}'_{-i|t_i}} [t_i(\mathcal{M}(t_i, t_{-i}))] + \mathbb{E}_{t_{-i} \sim \mathcal{D}'_{-i|t_i}} [t_i(\mathcal{M}(w_i, t_{-i}))] \leq \frac{8H\delta}{q}$ , with probability at least  $1 - q$ . Re-arranging we get the desired  $(\varepsilon, q)$  BIC constraint.  $\square$

## B Proofs missing from Section 4.1

In order to prove Lemma 5, it will be convenient to define the following notion of an extension of a BIC mechanism.

**Definition 4** (BIC extension of a mechanism). *Let  $\mathcal{T}_i^+ \subseteq \mathcal{T}_i$  be a subset of types for agent  $i \in [n]$  such that  $\perp \in \mathcal{T}_i^+$ , and let  $\mathcal{M} = (x, p)$  be a mechanism defined on types in  $\times_{i \in [n]} \mathcal{T}_i^+$ . Let  $\mathcal{T}_i^- = \mathcal{T}_i - \mathcal{T}_i^+$ , and consider the mapping*

$$\tau_i(t_i) = \begin{cases} t_i, & \text{if } t_i \in \mathcal{T}_i^+ \\ \arg \max_{z \in \mathcal{T}_i^+} \mathbb{E}_{t_{-i} \sim \mathcal{D}_{-i}} [t_i(\mathcal{M}(z, t_{-i}))], & \text{if } t_i \in \mathcal{T}_i^- \end{cases}$$

The extension of  $\mathcal{M}$  to  $\mathcal{T}$  is the mechanism  $\widehat{\mathcal{M}} = (\widehat{x}, \widehat{p})$ , where  $\widehat{x}(t) = x(\tau(t))$ , and for all  $i \in [n]$ ,

$$\widehat{p}_i(t_i, t_{-i}) = \begin{cases} p_i(t_i, t_{-i}), & \text{if } t_i \in \mathcal{T}_i^+ \\ v_i(\widehat{x}(t_i, t_{-i})) \frac{\mathbb{E}_{t_{-i} \sim \mathcal{D}_{-i}} [p_i(\tau_i(t_i), t_{-i})]}{\mathbb{E}_{t_{-i} \sim \mathcal{D}_{-i}} [v_i(x(\tau_i(t_i), t_{-i}))]}, & \text{if } t_i \in \mathcal{T}_i^- \end{cases}$$

We prove the following technical lemma.

**Lemma 7.** *Let  $\mathcal{T}_i^+ \subseteq \mathcal{T}_i$  be a subset of types for agent  $i \in [n]$  such that  $\perp \in \mathcal{T}_i^+$ , and let  $\mathcal{D} = \times_{i \in [n]} \mathcal{D}_i$  be a product distribution, where each  $\mathcal{D}_i$  is supported on  $\mathcal{T}_i$ . Let  $\mathcal{M} = (x, p)$  be an ex-post IR mechanism which satisfies  $\mathbb{E}_{t_{-i} \sim \mathcal{D}_{-i}} [u_i^{\mathcal{M}}(t_i \leftarrow w_i, t_{-i})] \geq -\varepsilon$ , for all  $t_i \in \mathcal{T}_i^+$ ,  $w_i \in \mathcal{T}_i$ .*

*Then, for any product distribution  $\widehat{\mathcal{D}} = \times_{i \in [n]} \widehat{\mathcal{D}}_i$  such that  $d_{\text{TV}}(\mathcal{D}, \widehat{\mathcal{D}}) \leq \delta$ , the extension of  $\mathcal{M}$  to  $\mathcal{T}$  (as defined in Definition 4) is ex-post IR and  $O(\varepsilon + (\beta n + \delta)H)$ -BIC with respect to  $\widehat{\mathcal{D}}$ , where  $\beta = 1 - \Pr_{t_i \sim \widehat{\mathcal{D}}_i} [t_i \in \mathcal{T}_i^+]$ . Furthermore,  $\text{Rev}(\widehat{\mathcal{M}}, \widehat{\mathcal{D}}) \geq \text{Rev}(\mathcal{M}, \mathcal{D}) - V(\beta n + \delta)$ .*

*Proof of Lemma 7.* Let  $\widehat{\mathcal{M}} = (\widehat{x}, \widehat{p})$  be the extension of  $\mathcal{M}$  to  $\mathcal{T}$ . First, we argue that  $\widehat{\mathcal{M}}$  is ex-post IR. Since  $\mathcal{M}$  is ex-post IR, the ex-post IR condition for  $\widehat{\mathcal{M}}$  is satisfied for all  $t_i \in \mathcal{T}_i^+$ , by construction. For a type  $t_i \in \mathcal{T}_i^-$ , since  $\perp \in \mathcal{T}_i^+$  and  $\tau_i(t_i) \in \mathcal{T}_i^+$ , we have that  $\mathbb{E}_{t_{-i} \sim \mathcal{D}_{-i}} [t_i(\mathcal{M}(\tau_i(t_i), t_{-i}))] \geq \mathbb{E}_{t_{-i} \sim \mathcal{D}_{-i}} [t_i(\mathcal{M}(\perp, t_{-i}))] = 0$ . Therefore,  $\mathbb{E}_{t_{-i} \sim \mathcal{D}_{-i}} [p_i(\tau_i(t_i), t_{-i})] \leq \mathbb{E}_{t_{-i} \sim \mathcal{D}_{-i}} [v_i(x(\tau_i(t_i), t_{-i}))]$ , which implies that  $v_i(\widehat{x}(t)) - \widehat{p}_i(t) = v_i(\widehat{x}(t)) - v_i(\widehat{x}(t)) \frac{\mathbb{E}_{t_{-i} \sim \mathcal{D}_{-i}} [p_i(\tau_i(t_i), t_{-i})]}{\mathbb{E}_{t_{-i} \sim \mathcal{D}_{-i}} [v_i(x(\tau_i(t_i), t_{-i}))]} \geq 0$ .

Next, we prove the BIC guarantee of  $\widehat{\mathcal{M}}$ . Towards this, first define  $\tau(\widehat{\mathcal{D}})$  as the distribution induced by first sampling from  $\widehat{\mathcal{D}}$ , and then apply mapping  $\tau(\cdot)$ , as defined in Definition 4. The tensorization property of TV distance [LPW09, Chapter 4] implies that  $d_{\text{TV}}(\widehat{\mathcal{D}}, \tau(\widehat{\mathcal{D}})) \leq \beta n$ , and thus from the triangle inequality,  $d_{\text{TV}}(\mathcal{D}, \tau(\widehat{\mathcal{D}})) \leq \delta + \beta n$ . Our goal is to prove the following lower bound:

$$\mathbb{E}_{t_{-i} \sim \widehat{\mathcal{D}}_{-i}} [u_i^{\widehat{\mathcal{M}}}(t_i \leftarrow w_i, t_{-i})] \geq - \left( 4 \left( \frac{3}{2} \delta + \beta n \right) H + 4\delta H + \varepsilon \right).$$

We first prove the following intermediate bound:

$$\mathbb{E}_{t_{-i} \sim \widehat{\mathcal{D}}_{-i}} [u_i^{\widehat{\mathcal{M}}}(t_i \leftarrow w_i, t_{-i})] \geq \mathbb{E}_{t_{-i} \sim \widehat{\mathcal{D}}_{-i}} [u_i^{\mathcal{M}}(\tau(t_i) \leftarrow \tau(w_i), t_{-i})] - 4 \left( \frac{3}{2} \delta + \beta n \right) H$$

Generally, our bounds will be trivial when  $t_i \in \mathcal{T}_i^+$  due to the nature of  $\widehat{\mathcal{M}}$ . So the main focus of the analysis is to prove those bounds for  $t_i \in \mathcal{T}_i^-$ .

First, we prove two inequalities that will be useful in our analysis.

$$\mathbb{E}_{t_{-i} \sim \mathcal{D}_{-i}} [v_i(x_i(\tau(t_i), t_{-i}))] \leq \mathbb{E}_{t_{-i} \sim \mathcal{D}_{-i}} [\widehat{x}_i(t_i, t_{-i})] + H \beta n. \quad (2)$$

$$\mathbb{E}_{t_{-i} \sim \mathcal{D}_{-i}} [p_i(\tau(t_i), t_{-i})] \geq \mathbb{E}_{t_{-i} \sim \mathcal{D}_{-i}} [\widehat{p}_i(t_i, t_{-i})] - H \beta n. \quad (3)$$

For inequality (2), using Lemma 2 we can get:

$$\begin{aligned}
\mathbb{E}_{t_{-i} \sim \mathcal{D}_{-i}} [v_i(x_i(\tau(t_i), t_{-i}))] &\leq \mathbb{E}_{t_{-i} \sim \tau(\mathcal{D}_{-i})} [v_i(x_i(\tau(t_i), t_{-i}))] + H d_{\text{TV}}(\mathcal{D}_{-i}, \tau(\mathcal{D}_{-i})) \\
&\leq \mathbb{E}_{t_{-i} \sim \tau(\mathcal{D}_{-i})} [v_i(x_i(\tau(t_i), t_{-i}))] + H d_{\text{TV}}(\mathcal{D}, \tau(\mathcal{D})) \\
&\leq \mathbb{E}_{t_{-i} \sim \tau(\mathcal{D}_{-i})} [v_i(x_i(\tau(t_i), t_{-i}))] + H \beta n \\
&\leq \mathbb{E}_{t_{-i} \sim \mathcal{D}_{-i}} [x_i(\tau(t_i), \tau(t_{-i}))] + H \beta n \\
&\leq \mathbb{E}_{t_{-i} \sim \mathcal{D}_{-i}} [\widehat{x}_i(t_i, t_{-i})] + H \beta n.
\end{aligned}$$

Similarly, for inequality (3):

$$\begin{aligned}
\mathbb{E}_{t_{-i} \sim \mathcal{D}_{-i}} [p_i(\tau(t_i), t_{-i})] &= \mathbb{E}_{t_{-i} \sim \mathcal{D}_{-i}} [p_i(\tau(t_i), t_{-i})] \frac{\mathbb{E}_{t'_{-i} \sim \mathcal{D}_{-i}} [v_i(x_i(\tau(t_i), t'_{-i}))]}{\mathbb{E}_{t_{-i} \sim \mathcal{D}_{-i}} [v_i(x_i(\tau(t_i), t_{-i}))]} \\
&= \mathbb{E}_{t'_{-i} \sim \mathcal{D}_{-i}} \left[ v_i(x_i(\tau(t_i), t'_{-i})) \frac{\mathbb{E}_{t_{-i} \sim \mathcal{D}_{-i}} [p_i(\tau(t_i), t_{-i})]}{\mathbb{E}_{t_{-i} \sim \mathcal{D}_{-i}} [v_i(x_i(\tau(t_i), t_{-i}))]} \right].
\end{aligned}$$

We've already shown, when arguing the ex-post IR property, that  $\frac{\mathbb{E}_{t_{-i} \sim \mathcal{D}_{-i}} [p_i(\tau(t_i), t_{-i})]}{\mathbb{E}_{t_{-i} \sim \mathcal{D}_{-i}} [v_i(x_i(\tau(t_i), t_{-i}))]} \leq 1$  and thus  $v_i(x_i(\tau(t_i), t'_{-i})) \frac{\mathbb{E}_{t_{-i} \sim \mathcal{D}_{-i}} [p_i(\tau(t_i), t_{-i})]}{\mathbb{E}_{t_{-i} \sim \mathcal{D}_{-i}} [v_i(x_i(\tau(t_i), t_{-i}))]} \in [0, H]$ . Therefore, we can use Lemma 2 for  $\mathcal{D}_{-i}$  and  $\tau(\mathcal{D}_{-i})$  on this function (as the objective) to get:

$$\begin{aligned}
\mathbb{E}_{t_{-i} \sim \mathcal{D}_{-i}} [p_i(\tau(t_i), t_{-i})] &= \mathbb{E}_{t'_{-i} \sim \mathcal{D}_{-i}} \left[ v_i(x_i(\tau(t_i), t'_{-i})) \frac{\mathbb{E}_{t_{-i} \sim \mathcal{D}_{-i}} [p_i(\tau(t_i), t_{-i})]}{\mathbb{E}_{t_{-i} \sim \mathcal{D}_{-i}} [v_i(x_i(\tau(t_i), t_{-i}))]} \right] \\
&\geq \mathbb{E}_{t'_{-i} \sim \tau(\mathcal{D}_{-i})} \left[ v_i(x_i(\tau(t_i), t'_{-i})) \frac{\mathbb{E}_{t_{-i} \sim \mathcal{D}_{-i}} [p_i(\tau(t_i), t_{-i})]}{\mathbb{E}_{t_{-i} \sim \mathcal{D}_{-i}} [v_i(x_i(\tau(t_i), t_{-i}))]} \right] - H d_{\text{TV}}(\mathcal{D}_{-i}, \tau(\mathcal{D}_{-i})) \\
&\geq \mathbb{E}_{t'_{-i} \sim \tau(\mathcal{D}_{-i})} \left[ v_i(x_i(\tau(t_i), t'_{-i})) \frac{\mathbb{E}_{t_{-i} \sim \mathcal{D}_{-i}} [p_i(\tau(t_i), t_{-i})]}{\mathbb{E}_{t_{-i} \sim \mathcal{D}_{-i}} [v_i(x_i(\tau(t_i), t_{-i}))]} \right] - H d_{\text{TV}}(\mathcal{D}, \tau(\mathcal{D})) \\
&\geq \mathbb{E}_{t'_{-i} \sim \tau(\mathcal{D}_{-i})} \left[ v_i(x_i(\tau(t_i), t'_{-i})) \frac{\mathbb{E}_{t_{-i} \sim \mathcal{D}_{-i}} [p_i(\tau(t_i), t_{-i})]}{\mathbb{E}_{t_{-i} \sim \mathcal{D}_{-i}} [v_i(x_i(\tau(t_i), t_{-i}))]} \right] - H \beta n \\
&= \mathbb{E}_{t'_{-i} \sim \mathcal{D}_{-i}} \left[ v_i(x_i(\tau(t_i), \tau(t'_{-i}))) \frac{\mathbb{E}_{t_{-i} \sim \mathcal{D}_{-i}} [p_i(\tau(t_i), t_{-i})]}{\mathbb{E}_{t_{-i} \sim \mathcal{D}_{-i}} [v_i(x_i(\tau(t_i), t_{-i}))]} \right] - H \beta n \\
&= \mathbb{E}_{t'_{-i} \sim \mathcal{D}_{-i}} [\widehat{p}_i(t_i, t'_{-i})] - H \beta n.
\end{aligned}$$

With inequalities (2) and (3) at hand, we are ready to show the following, for all  $t_i \in \mathcal{T}_i^-$ :

$$\begin{aligned}
\mathbb{E}_{t_{-i} \sim \widehat{\mathcal{D}}_{-i}} [t_i(\mathcal{M}(\tau(t_i), t_{-i}))] &\leq \stackrel{\text{(Lemma 2)}}{\leq} \mathbb{E}_{t_{-i} \sim \mathcal{D}_{-i}} [t_i(\mathcal{M}(\tau(t_i), t_{-i}))] + 2\delta H \\
&= \mathbb{E}_{t_{-i} \sim \mathcal{D}_{-i}} [(v_i(x_i(\tau(t_i), t_{-i})) - p_i(\tau(t_i), t_{-i}))] + 2\delta H \\
&\leq \stackrel{\text{(Ineq. (2) and (3))}}{\leq} \mathbb{E}_{t_{-i} \sim \mathcal{D}_{-i}} [\widehat{x}_i(t_i, t_{-i})] - \mathbb{E}_{t_{-i} \sim \mathcal{D}_{-i}} [\widehat{p}_i(t_i, t_{-i})] + 2(\delta + \beta n) H \\
&= \mathbb{E}_{t_{-i} \sim \mathcal{D}_{-i}} \left[ t_i \left( \widehat{\mathcal{M}}(t_i, t_{-i}) \right) \right] + 2(\delta + \beta n) H \\
&\leq \stackrel{\text{(Lemma 2)}}{\leq} \mathbb{E}_{t_{-i} \sim \widehat{\mathcal{D}}_{-i}} \left[ t_i \left( \widehat{\mathcal{M}}(t_i, t_{-i}) \right) \right] + 2 \left( \frac{3}{2} \delta + \beta n \right) H.
\end{aligned}$$

Whenever  $t_i \in \mathcal{T}_i^+$  we can directly argue that:

$$\begin{aligned}
\mathbb{E}_{y_{-i} \sim \widehat{\mathcal{D}}_{-i}} [t_i(\mathcal{M}(\tau(t_i), t_{-i}))] &\leq \mathbb{E}_{t_{-i} \sim \tau(\widehat{\mathcal{D}}_{-i})} [t_i(\mathcal{M}(\tau(t_i), t_{-i}))] + \beta n H \\
&= \mathbb{E}_{t_{-i} \sim \widehat{\mathcal{D}}_{-i}} [t_i(\mathcal{M}(\tau(t_i), \tau(t_{-i})))] + \beta n H \\
&= \mathbb{E}_{t_{-i} \sim \widehat{\mathcal{D}}_{-i}} \left[ t_i \left( \widehat{\mathcal{M}}(t_i, t_{-i}) \right) \right] + \beta n H.
\end{aligned}$$



Similarly, we get that  $\mathbb{E}_{t_{-i} \sim \widehat{\mathcal{D}}_{-i}} [t_i (\mathcal{M}(\tau(w_i), t_{-i}))] \geq \mathbb{E}_{t_{-i} \sim \widehat{\mathcal{D}}_{-i}} [t_i (\widehat{\mathcal{M}}(w_i, t_{-i}))] - 2(\frac{3}{2}\delta + \beta n) H$  for all  $w_i \in \mathcal{T}_i$ . Combining we get that for  $t_i \in \mathcal{T}_i^-, w_i \in \mathcal{T}_i$ :

$$\begin{aligned} & \mathbb{E}_{t_{-i} \sim \widehat{\mathcal{D}}_{-i}} [t_i (\widehat{\mathcal{M}}(t_i, t_{-i}))] - \mathbb{E}_{t_{-i} \sim \widehat{\mathcal{D}}_{-i}} [t_i (\widehat{\mathcal{M}}(w_i, t_{-i}))] \geq \\ & \mathbb{E}_{t_{-i} \sim \widehat{\mathcal{D}}_{-i}} [t_i (\mathcal{M}(\tau(t_i), t_{-i}))] - \mathbb{E}_{t_{-i} \sim \widehat{\mathcal{D}}_{-i}} [t_i (\mathcal{M}(\tau(w_i), t_{-i}))] - 4 \left( \frac{3}{2}\delta + \beta n \right) H, \end{aligned}$$

and for  $t_i \in \mathcal{T}_i^+, w_i \in \mathcal{T}_i$  we can get that  $\mathbb{E}_{t_{-i} \sim \widehat{\mathcal{D}}_{-i}} [t_i (\mathcal{M}(\tau(t_i), t_{-i}))] \geq \mathbb{E}_{t_{-i} \sim \widehat{\mathcal{D}}_{-i}} [t_i (\widehat{\mathcal{M}}(t_i, t_{-i}))] - \beta n H$ .

This concludes the proof of the intermediate bound. To conclude the proof for the BIC guarantee we need to show that:

$$\mathbb{E}_{t_{-i} \sim \widehat{\mathcal{D}}_{-i}} [u_i^{\mathcal{M}}(\tau(t_i) \leftarrow \tau(w_i), t_{-i})] \geq -4H\delta - \varepsilon.$$

By Proposition 5,  $u_i^{\mathcal{M}}(\tau(t_i) \leftarrow \tau(w_i), t_{-i}) \in [-H, 3H]$ , for all  $i \in [n], t_i, w_i \in \mathcal{T}_i, t_{-i} \in \mathcal{T}_{-i}$ , and hence  $u_i^{\mathcal{M}}(\tau(t_i) \leftarrow \tau(w_i), t_{-i}) - u_i^{\mathcal{M}}(\tau(t_i) \leftarrow \tau(w_i), t'_{-i}) \leq 4H \mathbb{1}\{t_{-i} \neq t'_{-i}\}$ . Thus, for any coupling  $\gamma$  of  $\mathcal{D}_{-i}$  and  $\widehat{\mathcal{D}}_{-i}$ , and thus for the optimal coupling  $\gamma^*$  between  $\mathcal{D}_{-i}$  and  $\widehat{\mathcal{D}}_{-i}$ , we get

$$\begin{aligned} \mathbb{E}_{(t_{-i}, t'_{-i}) \sim \gamma^*} [u_i^{\mathcal{M}}(\tau(t_i) \leftarrow \tau(w_i), t_{-i}) - u_i^{\mathcal{M}}(\tau(t_i) \leftarrow \tau(w_i), t'_{-i})] & \leq 4H d_{\text{TV}}(\mathcal{D}_{-i}, \widehat{\mathcal{D}}_{-i}) \\ & \leq 4H d_{\text{TV}}(\mathcal{D}, \widehat{\mathcal{D}}) \\ & \leq 3H \delta. \end{aligned}$$

Using linearity of expectation and the fact that the chosen coupling maintains the marginals, by re-arranging we have:

$$\begin{aligned} -\mathbb{E}_{t'_{-i} \sim \widehat{\mathcal{D}}_{-i}} [u_i^{\mathcal{M}}(\tau(t_i) \leftarrow \tau(w_i), t'_{-i})] & \leq 4H \delta - \mathbb{E}_{t_{-i} \sim \mathcal{D}_{-i}} [u_i^{\mathcal{M}}(\tau(t_i) \leftarrow \tau(w_i), t_{-i})] \\ & \leq 4H \delta + \varepsilon, \end{aligned}$$

where in the last inequality we used the fact that, since  $\tau(t_i) \in \mathcal{T}_i^+$ , from the definition of  $\mathcal{M}$ , for all  $w_i, t_i \in \mathcal{T}_i$ , we have  $\mathbb{E}_{t_{-i} \sim \mathcal{D}_{-i}} [u_i^{\mathcal{M}}(\tau(t_i) \leftarrow \tau(w_i), t_{-i})] \geq -\varepsilon$ .

We will now prove the revenue guarantee of the lemma. The tensorization property of TV distance [LPW09, Chapter 4] implies that  $d_{\text{TV}}(\widehat{\mathcal{D}}, \tau(\widehat{\mathcal{D}})) \leq \beta n$ , and thus from the triangle inequality,  $d_{\text{TV}}(\mathcal{D}, \tau(\widehat{\mathcal{D}})) \leq \delta + \beta n$ . Now notice from triangle inequality that  $d_{\text{TV}}(\mathcal{D}, \tau(\widehat{\mathcal{D}})) \leq d_{\text{TV}}(\mathcal{D}, \widehat{\mathcal{D}}) + d_{\text{TV}}(\widehat{\mathcal{D}}, \tau(\widehat{\mathcal{D}}))$ . Let  $t \sim \mathcal{D}$  and  $\widehat{t} \sim \tau(\widehat{\mathcal{D}})$ . Since  $d_{\text{TV}}(\mathcal{D}, \tau(\widehat{\mathcal{D}})) \leq \beta n + \delta$  there exists a coupling where  $t \neq \widehat{t}$  with probability less than  $\beta n + \delta$ . Whenever  $t = \widehat{t}$  the two mechanisms make exactly the same revenue. Whenever they are not, their difference is bounded by  $V$ . The desired inequality follows.  $\square$

Lemma 5 is then a simple corollary of Lemma 7.

*Proof of Lemma 5.* For an  $(\varepsilon, q)$ -BIC mechanism  $\mathcal{M}$ , one can split the type space  $\mathcal{T}_i$  of each agent  $i$  into two disjoint sets,  $\mathcal{T}_i^G$  and  $\mathcal{T}_i^B$ , such that when  $t_i \in \mathcal{T}_i^G$  agent  $i$   $\varepsilon$ -maximizes her utility by reporting  $t_i$ , and  $\Pr_{t_i \sim \mathcal{D}} [t_i \in \mathcal{T}_i^B] \leq q$ . Noting that  $\perp \in \mathcal{T}_i^G$ , the corollary is an immediate implication of Lemma 7.  $\square$

*Proof of Theorem 3.* The  $(\varepsilon, q)$ -BIC property is an immediate consequence of Lemma 4.

Applying Lemma 2, with  $\mathcal{O}$  as the revenue objective (which is lower bounded by  $-V/2$  and upper bounded by  $V/2$ ), and setting  $P = \mathcal{D}^p$ ,  $Q = \mathcal{D}$ , and  $\mathcal{M} = \mathcal{M}_{\mathcal{D}^p}^q$ , we have that  $\text{Rev}(\mathcal{M}_{\mathcal{D}^p}^q, \mathcal{D}) \geq \text{Rev}(\mathcal{M}_{\mathcal{D}^p}^q, \mathcal{D}^p) - 2V\delta \geq \alpha \text{OPT}(\mathcal{D}^p) - 2V\delta$ . Our main goal will be to lower bound  $\text{OPT}(\mathcal{D}^p)$ .

Let  $\mathcal{M}_{\mathcal{D}}^*$  be the revenue optimal mechanism for  $\mathcal{D}$ . By Lemma 4,  $\mathcal{M}_{\mathcal{D}}^*$  is an ex-post IR and  $(\frac{8H\delta}{q}, q)$ -BIC mechanism for  $\mathcal{D}^p$  (for all  $q \in [0, 1]$ ). Therefore, Lemma 5 implies that there exists a mechanism  $\widehat{\mathcal{M}}$  that is ex-post IR and  $O(\frac{H\delta}{q} + nqH)$ -BIC with respect to  $\mathcal{D}^p$ , such that  $Rev(\widehat{\mathcal{M}}, \mathcal{D}^p) \geq Rev(\mathcal{M}_{\mathcal{D}}^*, \mathcal{D}^p) - nqV$ .

Next, we apply the  $\varepsilon$ -BIC to BIC reduction of [COVZZ1], on the mechanism  $\mathcal{M}_{\mathcal{D}}^*$ . Specifically, we use the following lemma.

**Lemma 8** ([DW12], [RW18], [COVZZ1]). *In any  $n$  agent setting where the valuations of agents are bounded by  $H$ , for any mechanism  $\mathcal{M}$  with payments in  $[-H, H]$ , that is ex-post IR and  $\varepsilon$ -BIC with respect to some product distribution  $\mathcal{D}$ , there exists a mechanism  $\mathcal{M}'$  with payments in  $[-H, H]$ ,<sup>1</sup> that is ex-post IR and BIC with respect to  $\mathcal{D}$ , such that, assuming truthful bidding  $Rev(\mathcal{M}', \mathcal{D}) \geq Rev(\mathcal{M}, \mathcal{D}) - O(n\sqrt{H\varepsilon})$ .*

So, Lemma 8 implies that there exists a mechanism  $\mathcal{M}'$  that is ex-post IR and BIC with respect to  $\mathcal{D}^p$  such that  $Rev(\mathcal{M}', \mathcal{D}^p) \geq Rev(\widehat{\mathcal{M}}, \mathcal{D}^p) - O(n\sqrt{H(\frac{H\delta}{q} + nqH)})$ . Combining all the ingredients so far, we have

$$\begin{aligned} Rev(\mathcal{M}_{\mathcal{D}^p}^a, \mathcal{D}) &\geq Rev(\mathcal{M}_{\mathcal{D}^p}^a, \mathcal{D}^p) - V\delta \\ &\geq \alpha OPT(\mathcal{D}^p) - V\delta \\ &\geq \alpha Rev(\mathcal{M}', \mathcal{D}^p) - V\delta \\ &\geq \alpha Rev(\widehat{\mathcal{M}}, \mathcal{D}^p) - O\left(\alpha n\sqrt{H\left(\frac{H\delta}{q} + nqH\right)} + V\delta\right) \\ &\geq \alpha Rev(\mathcal{M}_{\mathcal{D}}^*, \mathcal{D}^p) - O\left(\alpha n\sqrt{H\left(\frac{H\delta}{q} + nqH\right)} + V(\delta + \alpha nq)\right) \\ &= \alpha Rev(\mathcal{M}_{\mathcal{D}}^*, \mathcal{D}^p) - O\left(\alpha nH\sqrt{\frac{\delta}{q} + nq} + V(\delta + \alpha nq)\right) \end{aligned}$$

Applying Lemma 2 again, with  $P = \mathcal{D}$ ,  $Q = \mathcal{D}^p$ , and  $\mathcal{M} = \mathcal{M}_{\mathcal{D}}^*$  we have  $Rev(\mathcal{M}_{\mathcal{D}}^*, \mathcal{D}^p) \geq OPT(\mathcal{D}) - V\delta$ . Combining with the previous inequality, we have  $Rev(\mathcal{M}_{\mathcal{D}^p}^a, \mathcal{D}) \geq \alpha OPT(\mathcal{D}) - O\left(\alpha nH\sqrt{\frac{\delta}{q} + nq} + \alpha nqV + (1 + \alpha)V\delta\right)$ . Picking  $q = \sqrt{\delta/n}$ , and noting that  $V \leq 2nH$ , we have:  $Rev(\mathcal{M}_{\mathcal{D}^p}^a, \mathcal{D}) \geq \alpha OPT(\mathcal{D}) - O\left(\alpha V(n\delta)^{1/4} + \alpha V(n\delta)^{1/2} + (1 + \alpha)V\delta\right) \geq \alpha OPT(\mathcal{D}) - O\left((1 + \alpha)V\sqrt{n\sqrt{\delta}}\right)$ .  $\square$

*Proof of Proposition 1.* The marginal distributions for  $\mathcal{D}^p$  and  $\mathcal{D}$  are close in total variation distance, and specifically,  $d_{TV}(\widehat{\mathcal{D}}_i, \mathcal{D}_i^p) \leq d_{TV}(\widehat{\mathcal{D}}, \mathcal{D}^p) \leq \varepsilon$ . Therefore,  $d_{TV}(\mathcal{D}_i, \mathcal{D}_i^p) \leq \varepsilon$ , which implies that  $d_{TV}(\mathcal{D}, \mathcal{D}^p) \leq n\varepsilon$ . Applying the triangle inequality completes the proof.  $\square$

## C Proofs missing from Section 4.2

*Proof of Theorem 4.* In order to prove this theorem we will first need to prove two intermediate lemmas. Recall that  $\Pi(\mathcal{D}_1, \dots, \mathcal{D}_n) = \{\mathcal{D}' | \Pr_{t_i \sim \mathcal{D}_i}[t_i = v_i] = \sum_{v_{-i} \in \mathcal{T}_{-i}} \Pr_{t \sim \mathcal{D}'}[t = (v_i, v_{-i})], \forall i \in [n], \forall t_i \in \mathcal{T}_i\}$ .

**Lemma 9.** *For any distribution  $\mathcal{D} \in \Pi(\mathcal{D}_1, \dots, \mathcal{D}_n)$  there exists a distribution  $\mathcal{D}' \in \Pi(\mathcal{D}'_1, \dots, \mathcal{D}'_n)$  such that  $d_{TV}(\mathcal{D}, \mathcal{D}') \leq n\varepsilon$ , where for all  $i$ ,  $d_{TV}(\mathcal{D}_i, \mathcal{D}'_i) \leq \varepsilon$ .*

<sup>1</sup>In the reduction payments are only scaled by a value less than 1. Thus if  $\mathcal{M}$  had payments in  $[-H, H]$ , then  $\mathcal{M}'$  also has payments in that range.

*Proof.* We will prove an intermediate step that will then immediately yield the desired outcomes. More precisely we will first show that for any distribution  $\mathcal{D}^{(i-1)} \in \Pi(\mathcal{D}'_1, \dots, \mathcal{D}'_{i-1}, \mathcal{D}_i, \dots, \mathcal{D}_n)$  there exists a distribution  $\mathcal{D}^{(i)} \in \Pi(\mathcal{D}'_1, \dots, \mathcal{D}'_{i-1}, \mathcal{D}'_i, \dots, \mathcal{D}_n)$  such that  $d_{\text{TV}}(\mathcal{D}^{(i-1)}, \mathcal{D}^{(i)}) \leq \varepsilon$ , where  $d_{\text{TV}}(\mathcal{D}_i, \mathcal{D}'_i) \leq \varepsilon$ . To prove this we will leverage the  $\mathcal{L}^1$ -distance characterization of TV distance.

Our proof will be constructive through a simple ‘‘moving mass’’ argument. For simplicity let’s assume that there exist  $v_i, v'_i \in \mathcal{T}_i$  such that  $\Pr_{t_i \sim \mathcal{D}_i}[t_i = v_i] = \Pr_{t'_i \sim \mathcal{D}'_i}[t'_i = v_i] + \varepsilon$  and  $\Pr_{t_i \sim \mathcal{D}_i}[t_i = v'_i] = \Pr_{t'_i \sim \mathcal{D}'_i}[t'_i = v'_i] - \varepsilon$ . Extending the following procedure for arbitrary  $\mathcal{D}_i, \mathcal{D}'_i$  such that  $d_{\text{TV}}(\mathcal{D}_i, \mathcal{D}'_i) \leq \varepsilon$  will be immediate. Given  $\mathcal{D}^{(i-1)}$ , construct  $\mathcal{D}^{(i)}$  as follows:

1. Set  $\varepsilon_{\text{cur}} = \varepsilon$  and  $\mathcal{D}^{(i-1)} = \mathcal{D}^{(i)}$ .
2. As long as  $\varepsilon_{\text{cur}} > 0$  do the following process:
  - (a) Find  $v_{-i} \in \mathcal{T}_{-i}$  such that  $\Pr_{t' \sim \mathcal{D}^{(i)}}[t' = (v_i, v_{-i})] > 0$  and let  $\gamma$  be the minimum of  $\Pr_{t' \sim \mathcal{D}^{(i)}}[t' = (v_i, v_{-i})]$  and  $\varepsilon_{\text{cur}}$ .
  - (b) Change  $\mathcal{D}^{(i)}$  such that  $\Pr_{t' \sim \mathcal{D}^{(i)}}[t' = (v_i, v_{-i})] - \gamma$  and  $\Pr_{t' \sim \mathcal{D}^{(i)}}[t' = (v'_i, v_{-i})] + \gamma$ .
  - (c) Set  $\varepsilon_{\text{cur}} = \varepsilon_{\text{cur}} - \gamma$
3. Output  $\mathcal{D}^{(i)}$

From our construction of  $\mathcal{D}^{(i)}$  it is immediate that  $\mathcal{D}^{(i)} \in \Pi(\mathcal{D}'_1, \dots, \mathcal{D}'_{i-1}, \mathcal{D}'_i, \dots, \mathcal{D}_n)$  and  $d_{\text{TV}}(\mathcal{D}^{(i-1)}, \mathcal{D}^{(i)}) \leq \varepsilon$ . Chaining up the resulting inequalities and using triangle inequality concludes the proof.  $\square$

Leveraging the above we can prove the following:

**Lemma 10.** *For any mechanism  $\mathcal{M}$  and sets of marginals  $(\mathcal{D}_1, \dots, \mathcal{D}_n)$  and  $(\mathcal{D}'_1, \dots, \mathcal{D}'_n)$  such that for all  $i \in [n]$ ,  $d_{\text{TV}}(\mathcal{D}_i, \mathcal{D}'_i) \leq \varepsilon$  we have that:*

$$\min_{\mathcal{D} \in \Pi(\mathcal{D}_1, \dots, \mathcal{D}_n)} \mathbb{E}_{t \sim \mathcal{D}}[\mathcal{O}(t, \mathcal{M}(t))] \geq \min_{\mathcal{D}' \in \Pi(\mathcal{D}'_1, \dots, \mathcal{D}'_n)} \mathbb{E}_{t' \sim \mathcal{D}'}[\mathcal{O}(t', \mathcal{M}(t'))] - n\varepsilon V$$

*Proof.* We will prove this using a contradiction. Assume that

$$\min_{\mathcal{D} \in \Pi(\mathcal{D}_1, \dots, \mathcal{D}_n)} \mathbb{E}_{t \sim \mathcal{D}}[\mathcal{O}(t, \mathcal{M}(t))] < \min_{\mathcal{D}' \in \Pi(\mathcal{D}'_1, \dots, \mathcal{D}'_n)} \mathbb{E}_{t' \sim \mathcal{D}'}[\mathcal{O}(t', \mathcal{M}(t'))] - n\varepsilon V.$$

Lets call  $\mathcal{D}^* = \arg \min_{\mathcal{D} \in \Pi(\mathcal{D}_1, \dots, \mathcal{D}_n)} \mathbb{E}_{t \sim \mathcal{D}}[\mathcal{O}(t, \mathcal{M}(t))]$ . Now using Lemma 9 we have that there exists  $\widehat{\mathcal{D}}^* \in \Pi(\mathcal{D}'_1, \dots, \mathcal{D}'_n)$  such that  $d_{\text{TV}}(\mathcal{D}^*, \widehat{\mathcal{D}}^*) \leq n\varepsilon$ . Using Lemma 2 we have that  $\mathbb{E}_{t \sim \mathcal{D}^*}[\mathcal{O}(t, \mathcal{M}(t))] \geq \mathbb{E}_{t \sim \widehat{\mathcal{D}}^*}[\mathcal{O}(t, \mathcal{M}(t))] - n\varepsilon V$ . Chaining the above inequalities we get that:

$$\mathbb{E}_{t \sim \widehat{\mathcal{D}}^*}[\mathcal{O}(t, \mathcal{M}(t))] - n\varepsilon V \leq \mathbb{E}_{t \sim \mathcal{D}^*}[\mathcal{O}(t, \mathcal{M}(t))] < \min_{\mathcal{D}' \in \Pi(\mathcal{D}'_1, \dots, \mathcal{D}'_n)} \mathbb{E}_{t' \sim \mathcal{D}'}[\mathcal{O}(t', \mathcal{M}(t'))] - n\varepsilon V$$

However,  $\min_{\mathcal{D}' \in \Pi(\mathcal{D}'_1, \dots, \mathcal{D}'_n)} \mathbb{E}_{t' \sim \mathcal{D}'}[\mathcal{O}(t', \mathcal{M}(t'))] - n\varepsilon V \leq \mathbb{E}_{t \sim \widehat{\mathcal{D}}^*}[\mathcal{O}(t, \mathcal{M}(t))] - n\varepsilon V$  which concludes the contradiction.  $\square$

Now we have all the components to prove the main theorem.

First by using Lemma 10 on  $\mathcal{M}^\alpha$  we have that  $\min_{\mathcal{D}' \in \Pi(\mathcal{D}'_1, \dots, \mathcal{D}'_n)} \mathbb{E}_{t \sim \mathcal{D}'}[\mathcal{O}(t, \mathcal{M}^\alpha(t))] \geq \min_{\mathcal{D} \in \Pi(\mathcal{D}_1, \dots, \mathcal{D}_n)} \mathbb{E}_{t \sim \mathcal{D}}[\mathcal{O}(t, \mathcal{M}^\alpha(t))] - n\varepsilon V$ .

Now lets call  $\mathcal{M}^* = \arg \max_{\mathcal{M}'} \min_{\mathcal{D}' \in \Pi(\mathcal{D}'_1, \dots, \mathcal{D}'_n)} \mathbb{E}_{t \sim \mathcal{D}'}[\mathcal{O}(t, \mathcal{M}'(t))]$ . By applying Lemma 10 on  $\mathcal{M}^*$  we have that  $\min_{\mathcal{D} \in \Pi(\mathcal{D}_1, \dots, \mathcal{D}_n)} \mathbb{E}_{t \sim \mathcal{D}}[\mathcal{O}(t, \mathcal{M}^*(t))] \geq$

$\min_{\mathcal{D}' \in \Pi(\mathcal{D}'_1, \dots, \mathcal{D}'_n)} \mathbb{E}_{t \sim \mathcal{D}'} [\mathcal{O}(t, \mathcal{M}^*(t))]$ . Chaining all of the above we have that:

$$\begin{aligned}
\min_{\mathcal{D}' \in \Pi(\mathcal{D}'_1, \dots, \mathcal{D}'_n)} \mathbb{E}_{t \sim \mathcal{D}'} [\mathcal{O}(t, \mathcal{M}^\alpha(t))] &\geq \min_{\mathcal{D} \in \Pi(\mathcal{D}_1, \dots, \mathcal{D}_n)} \mathbb{E}_{t \sim \mathcal{D}} [\mathcal{O}(t, \mathcal{M}^\alpha(t))] - n\varepsilon V \\
&\geq \alpha \max_{\mathcal{M}'} \min_{\mathcal{D} \in \Pi(\mathcal{D}_1, \dots, \mathcal{D}_n)} \mathbb{E}_{t \sim \mathcal{D}} [\mathcal{O}(t, \mathcal{M}'(t))] - n\varepsilon V \\
&\geq \alpha \min_{\mathcal{D} \in \Pi(\mathcal{D}_1, \dots, \mathcal{D}_n)} \mathbb{E}_{t \sim \mathcal{D}} [\mathcal{O}(t, \mathcal{M}^*(t))] - n\varepsilon V \\
&\geq \alpha \min_{\mathcal{D}' \in \Pi(\mathcal{D}'_1, \dots, \mathcal{D}'_n)} \mathbb{E}_{t \sim \mathcal{D}'} [\mathcal{O}(t, \mathcal{M}^*(t))] - (1 + \alpha)n\varepsilon V \\
&= \alpha \max_{\mathcal{M}'} \min_{\mathcal{D}' \in \Pi(\mathcal{D}'_1, \dots, \mathcal{D}'_n)} \mathbb{E}_{t \sim \mathcal{D}'} [\mathcal{O}(t, \mathcal{M}'(t))] - (1 + \alpha)n\varepsilon V.
\end{aligned}$$

□

## D Proofs missing from Section 4.4

*Proof of Proposition 2.* Let  $S_{\mathcal{D}}$  be the mechanism that implements the better of bundling and selling separately, as computed on a prior  $\mathcal{D}$ .  $S_{\mathcal{D}^p}$  is a DISC and ex-post IR mechanism, and  $Rev(S_{\mathcal{D}^p}, \mathcal{D}^p) \geq \frac{1}{6} Rev(\mathcal{D}^p)$ . Thus, applying Theorem 1 we have that  $Rev(S_{\mathcal{D}^p}, \mathcal{D}) \geq \frac{1}{6} Rev(\mathcal{D}) - \frac{7}{6} H\delta$ . The mechanism  $S_{\mathcal{D}^p}$  is either selling each item separately, or it is setting a posted price for the grand bundle. If the former case occurs, then running  $S_{\mathcal{D}^p}$  on  $\mathcal{D}$  makes (weakly) less revenue than  $SRev(\mathcal{D})$ ; if the latter case occurs, running  $S_{\mathcal{D}^p}$  on  $\mathcal{D}$  makes (weakly) less revenue than  $BRev(\mathcal{D})$ . Therefore, we overall have that  $Rev(S_{\mathcal{D}}, \mathcal{D}) \geq Rev(S_{\mathcal{D}^p}, \mathcal{D})$ . Combining with the previous inequality we get  $Rev(S_{\mathcal{D}}, \mathcal{D}) \geq \frac{1}{6} Rev(\mathcal{D}) - \frac{7}{6} H\delta$ . □

**MRFs.** We state some basic definitions for Markov Random Fields.

**Definition 5** (Markov Random Field [SK75],[KS80],[CO21]). *A Markov Random Field (MRF) is defined by a hypergraph  $G = (V, E)$ . Associated with every vertex  $v \in V$  is a random variable  $X_v$  taking values in some alphabet  $\Sigma_v$ , as well as a potential function  $\psi_v : \Sigma_v \rightarrow \mathbb{R}$ . Associated with every hyperedge  $e \subseteq E$  is a potential function  $\psi_e : \Sigma_e \rightarrow \mathbb{R}$ . In terms of these potentials, we define a probability distribution  $\mathcal{D}$  associating to each vector  $\mathbf{c} \in \times_{v \in V} \Sigma_v$  probability  $\mathcal{D}(\mathbf{c})$  satisfying:  $\mathcal{D}(\mathbf{c}) \propto \prod_{v \in V} e^{\psi_v(c_v)} \prod_{e \in E} e^{\psi_e(\mathbf{c}_e)}$ , where  $\Sigma_e$  denotes  $\times_{v \in e} \Sigma_v$  and  $\mathbf{c}_e$  denotes  $\{c_v\}_{v \in e}$ .*

**Definition 6** ([CO21]). *Given a random variable/type  $\mathbf{t}$  generated by an MRF over a hypergraph  $G = ([m], E)$ , we define **weighted degree** of item  $i$  as:  $d_i := \max_{x \in \mathcal{T}} |\sum_{e \in E: i \in e} \psi_e(x_e)|$  and the **maximum weighted degree** as  $\Delta := \max_{i \in [m]} d_i$ .*

**Lemma 11** (Lemma 2[CO21]). *Let random variable  $t$  be generated by an MRF. For any  $i$  and any set  $\mathcal{E} \subseteq \mathcal{T}_i$  and set  $\mathcal{E}' \subseteq \mathcal{T}_{-i}$ :*

$$\exp(-4\Delta) \leq \frac{\Pr_{t \sim \mathcal{D}} [t_i \in \mathcal{E} \wedge t_{-i} \in \mathcal{E}']}{\Pr_{t_i \sim \mathcal{D}_i} [t_i \in \mathcal{E}] \Pr_{t_{-i} \sim \mathcal{D}_{-i}} [t_{-i} \in \mathcal{E}']} \leq \exp(4\Delta)$$

*Proof of Proposition 3.* Consider the case where  $m = 2$ . Assume that for each item there exist two possible valuations  $A, B$ . Consider the following distribution  $\mathcal{D}$  of possible valuations.  $\Pr_{(t_1, t_2) \sim \mathcal{D}} [(t_1, t_2) = (A, A)] = 1 - 2k + k^3$ ,  $\Pr_{(t_1, t_2) \sim \mathcal{D}} [(t_1, t_2) = (A, B)] = \Pr_{(t_1, t_2) \sim \mathcal{D}} [(t_1, t_2) = (B, A)] = k - k^3$ ,  $\Pr_{(t_1, t_2) \sim \mathcal{D}} [(t_1, t_2) = (B, B)] = k^3$ . Notice that for any  $0 < k < 1/2$  this is a valid distribution. Its TV distance from the product of its marginals is  $2(k^2 - k^3) \leq 2k^2$ . From Lemma 11 we have  $\exp(-4\Delta) \leq \frac{\Pr_{(t_1, t_2) \sim \mathcal{D}} [t_1 = B \wedge t_2 = B]}{\Pr_{t_1 \sim \mathcal{D}_1} [t_1 = B] \cdot \Pr_{t_2 \sim \mathcal{D}_2} [t_2 = B]} = \frac{k^3}{k \cdot k} = k$ , which implies that  $\Delta \geq \frac{1}{4} \log(\frac{1}{k})$ . □

We can prove the statement of Proposition 3 in a different way by constructing a distribution  $\mathcal{D}$  that is close to a product distribution but the parameter  $\Delta$  is arbitrarily large.

*Proof.* Let  $\mathcal{D}^p$  be a product distribution such that  $\mathcal{D}^p(t) = \frac{1}{Z} \prod_{v \in V} e^{\psi_v(t_v)}$  where  $Z$  (known as the partition function) normalizes the values to ensure that  $\mathcal{D}^p$  is a probability distribution. Consider the profile  $t^*$  that happens with the smallest probability. Let that probability be  $0 < \delta \leq \frac{1}{2}$ . We have that

$$\mathcal{D}^p(t^*) = \frac{1}{Z} \prod_{v \in V} e^{\psi_v(t_v^*)} = \delta \tag{4}$$

We can construct a joint distribution  $\mathcal{D}$  that is produced by an MRF in a way that the TV distance between  $\mathcal{D}^p$  and  $\mathcal{D}$  is bounded by  $\delta$  while the parameter  $\Delta$  of the MRF grows to infinity.

Let  $\mathcal{D}(t) \propto \prod_{v \in V} e^{\widehat{\psi}_v(t_v)} \prod_{e \in E} e^{\psi_e(\mathbf{t}_e)}$  for some potential functions  $\widehat{\psi}_v(\cdot)$  and  $\psi_e(\cdot)$ . We can construct  $\mathcal{D}$  by selecting  $\widehat{\psi}_v(t_v) = \psi_v(t_v)$  for all  $v \in V$ . Consider hyperedge  $e^* = V$  (i.e.  $e^*$  is the hyperedge that connects all nodes in  $V$ ). For that hyperedge  $e^*$  and the profile  $t^*$  we choose  $\psi_{e^*}(\mathbf{t}^*) \neq 0$ , and for all other combinations of hyperedges  $e$  and profiles  $t_e$  we have that  $\psi_e(\mathbf{t}_e) = 0$ . We choose  $\psi_{e^*}(\mathbf{t}^*)$  value such that  $\mathcal{D}(t^*) = \epsilon$ , for some  $0 \leq \epsilon < \delta$ . For ease of notation let  $e^{\psi_{e^*}(\mathbf{t}^*)} = c(\epsilon)$ . Let  $Z'(\epsilon)$  be the partition function of  $\mathcal{D}$ , which depends on the choice of  $\epsilon$ . From the above, it is not difficult to see that  $\forall t \neq t^* : \mathcal{D}(t) = \frac{1}{Z'(\epsilon)} \prod_{v \in V} e^{\psi_v(t_v)}$ , and  $\mathcal{D}(t^*) = \frac{1}{Z'(\epsilon)} \prod_{v \in V} e^{\psi_v(t_v)} e^{\psi_{e^*}(\mathbf{t}^*)} = \frac{1}{Z'(\epsilon)} \prod_{v \in V} e^{\psi_v(t_v)} \cdot c(\epsilon)$ . Using Equation (4), we can rewrite  $\mathcal{D}(t^*)$  as

$$\mathcal{D}(t^*) = \frac{1}{Z'(\epsilon)} \prod_{v \in V} e^{\psi_v(t_v^*)} e^{\psi_{e^*}(\mathbf{t}^*)} = \frac{Z}{Z'(\epsilon)} \cdot \delta \cdot c(\epsilon) = \epsilon. \quad (5)$$

By the definition of the partition function we have that  $Z = \sum_{t \in \mathcal{T}} \prod_{v \in V} e^{\psi_v(t_v)}$ , and  $Z'(\epsilon) = \sum_{t \in \mathcal{T}} \prod_{v \in V} e^{\psi_v(t_v)} \prod_{e \in E} e^{\psi_e(\mathbf{t}_e)} = \sum_{t \in \mathcal{T}: t \neq t^*} \prod_{v \in V} e^{\psi_v(t_v)} + \prod_{v \in V} e^{\psi_v(t_v^*)} \cdot c(\epsilon)$ . Since  $\mathcal{D}^p(t^*) = \delta$  the remaining probability for all profiles is  $(1 - \delta)$ , so for the first part of the sum we have  $\sum_{t \in \mathcal{T}: t \neq t^*} \prod_{v \in V} e^{\psi_v(t_v)} = Z(1 - \delta)$ . We can use again Equation (4) to simplify the second part of  $Z'(\epsilon)$ . Therefore, we have

$$Z'(\epsilon) = Z(1 - \delta) + Z \cdot \delta \cdot c(\epsilon) \quad (6)$$

Rearranging Equation (5) we have  $Z \cdot \delta \cdot c(\epsilon) = \epsilon \cdot Z'(\epsilon)$ . Substituting that into Equation (6) we get that  $Z'(\epsilon) = Z \frac{1 - \delta}{1 - \epsilon}$ . Using the last formula back into Equation (5) we get that  $c(\epsilon) = \frac{(1 - \delta)\epsilon}{(1 - \epsilon)\delta}$ . As we take the probability  $\mathcal{D}(t^*)$  to zero we have  $\lim_{\epsilon \rightarrow 0} c(\epsilon) = \frac{(1 - \delta)\epsilon}{(1 - \epsilon)\delta} = 0$ , and  $\lim_{\epsilon \rightarrow 0} Z'(\epsilon) = \frac{Z(1 - \delta)}{1 - \epsilon} = Z(1 - \delta)$ . Therefore, the distribution  $\mathcal{D}$  behaves nicely as we take the probability of  $t^*$  to zero. By Definition 6,  $\Delta(\epsilon) = |\psi_{e^*}(\mathbf{t}^*)|$  since it is the only non-zero value of the potential function  $\psi_e(\cdot)$ . By definition  $e^{\psi_{e^*}(\mathbf{t}^*)} = c(\epsilon) \implies \psi_{e^*}(\mathbf{t}^*) = \ln(c(\epsilon))$ . Taking again  $\epsilon$  to zero we can show that  $\Delta(\epsilon)$  goes to infinity,  $\lim_{\epsilon \rightarrow 0} \Delta(\epsilon) = \lim_{\epsilon \rightarrow 0} \ln(c(\epsilon)) = -\infty$ .

We can calculate the TV distance:

$$\begin{aligned} 2 d_{\text{TV}}(\mathcal{D}, \mathcal{D}^p) &= \sum_{t \in \mathcal{T}} |\mathcal{D}(t) - \mathcal{D}^p(t)| \\ &= \sum_{t \in \mathcal{T}: t \neq t^*} |\mathcal{D}(t) - \mathcal{D}^p(t)| + |\mathcal{D}(t^*) - \mathcal{D}^p(t^*)| \\ &= \sum_{t \in \mathcal{T}: t \neq t^*} \left| \frac{1}{Z} \prod_{v \in V} e^{\psi_v(t_v)} - \frac{1}{Z'(\epsilon)} \prod_{v \in V} e^{\psi_v(t_v)} \right| + \delta - \epsilon \\ &= \left| 1 - \frac{Z}{Z'(\epsilon)} \right| \sum_{t \in \mathcal{T}: t \neq t^*} \left| \frac{1}{Z} \prod_{v \in V} e^{\psi_v(t_v)} \right| + \delta - \epsilon \\ &= \left| 1 - \frac{1 - \epsilon}{1 - \delta} \right| (1 - \delta) + \delta - \epsilon \\ &= 2(\delta - \epsilon) \end{aligned}$$

To go from line 5 to line 6 we use the fact that  $Z'(\epsilon) = Z \frac{1 - \delta}{1 - \epsilon}$  and that the sum of the probabilities according to  $\mathcal{D}^p$  of all the profiles except  $t^*$  is  $1 - \delta$ .

That concludes the proof that there exists a distribution  $\mathcal{D}$  that is at most  $\delta$  away in TV from a product distribution for which the parameter  $\Delta$  is unbounded.  $\square$

*Proof of Proposition 4.* As a first step, we are going to bound the Kullback-Leibler (KL) divergence between the distribution  $\mathcal{D}$  and a product distribution  $\mathcal{D}^p$ . Then we are going to use Pinsker's inequality [Tsy08] and the Bretagnolle-Huber inequality [Tsy08, BH78] to bound the TV distance using KL divergence.

Let  $\mathcal{D}(t) = \frac{1}{Z_1} \prod_{v \in V} e^{\psi_v(t_v)} \prod_{e \in E} e^{\psi_e(t_e)}$ , where  $Z_1$  is the partition function. Let  $\mathcal{D}^p$  be product distribution such that  $\mathcal{D}^p(t) = \frac{1}{Z_2} \prod_{v \in V} e^{\psi_v(t_v)}$ , where  $Z_2$  is the partition function.

The KL divergence is between  $\mathcal{D}$  and  $\mathcal{D}^p$  is:

$$\begin{aligned}
D_{KL}(\mathcal{D}||\mathcal{D}^p) &= \sum_{t \in \mathcal{T}} \mathcal{D}(t) \log \frac{\mathcal{D}(t)}{\mathcal{D}^p(t)} \\
&= \sum_{t \in \mathcal{T}} \mathcal{D}(t) \log \frac{Z_2 \prod_{v \in V} e^{\psi_v(t_v)} \prod_{e \in E} e^{\psi_e(t_e)}}{Z_1 \prod_{v \in V} e^{\psi_v(t_v)}} \\
&= \sum_{t \in \mathcal{T}} \mathcal{D}(t) \log \frac{Z_2}{Z_1} \prod_{e \in E} e^{\psi_e(t_e)} \\
&= \sum_{t \in \mathcal{T}} \mathcal{D}(t) \left( \log \frac{Z_2}{Z_1} + \sum_{e \in E} \psi_e(t_e) \right) \\
&\leq \sum_{t \in \mathcal{T}} \mathcal{D}(t) \left( \log \frac{Z_2}{Z_1} + \frac{m}{2} \Delta \right) \\
&= \frac{m}{2} \Delta + \log \frac{Z_2}{Z_1}
\end{aligned}$$

Since KL divergence is not symmetric, we can also compute:  $D_{KL}(\mathcal{D}^p||\mathcal{D})$ :

$$\begin{aligned}
D_{KL}(\mathcal{D}^p||\mathcal{D}) &= \sum_{t \in \mathcal{T}} \mathcal{D}^p(t) \log \frac{\mathcal{D}^p(t)}{\mathcal{D}(t)} \\
&= \sum_{t \in \mathcal{T}} \mathcal{D}(t) \log \frac{Z_1 \prod_{v \in V} e^{\psi_v(t_v)}}{Z_2 \prod_{v \in V} e^{\psi_v(t_v)} \prod_{e \in E} e^{\psi_e(t_e)}} \\
&= \sum_{t \in \mathcal{T}} \mathcal{D}(t) \log \frac{Z_1}{Z_2} \prod_{e \in E} e^{-\psi_e(t_e)} \\
&= \sum_{t \in \mathcal{T}} \mathcal{D}(t) \left( \log \frac{Z_1}{Z_2} - \sum_{e \in E} \psi_e(t_e) \right) \\
&\leq \sum_{t \in \mathcal{T}} \mathcal{D}(t) \left( \log \frac{Z_1}{Z_2} + \frac{m}{2} \Delta \right) \\
&= \frac{m}{2} \Delta - \log \frac{Z_2}{Z_1}
\end{aligned}$$

We can get that  $\sum_{e \in E} \psi_e(t_e) \in \left[-\frac{m}{2} \Delta, \frac{m}{2} \Delta\right]$  as follows.  $\sum_e \psi_e(t_e) = \frac{1}{2} \sum_{i \in [m]} \sum_{e \in E: i \in e} \psi_e(t_e) \leq \frac{1}{2} \sum_{i \in [m]} d_i \leq \frac{m \Delta}{2}$ . Similarly, we can lower bound  $\sum_{e \in E} \psi_e(t_e) \geq -\frac{m \Delta}{2}$  since the definition of  $d_i$  is  $d_i := \max_{x \in \mathcal{T}} |\sum_{e \in E: i \in e} \psi_e(x_e)|$ .

From the above inequalities we have that  $\min\{D_{KL}(\mathcal{D}^p||\mathcal{D}), D_{KL}(\mathcal{D}||\mathcal{D}^p)\} \leq \frac{m}{2} \Delta$ . From Pinsker's inequality we get  $d_{TV}(\mathcal{D}, \mathcal{D}^p) \leq \sqrt{\frac{m \Delta}{4}}$ , and from the Bretagnolle-Huber inequality we get  $d_{TV}(\mathcal{D}, \mathcal{D}^p) \leq \sqrt{1 - \exp(-m \Delta / 2)}$ . Combining these inequalities we have the desired bound on the TV distance.  $\square$
